# Supplementary material
Source: MDPI journal article supplement (https://www.mdpi.com/2227-9040/9/5/94)
Supplement: s1 [file s1]

Article

# Determination of Trace Levels of Nickel(II) by Adsorptive Stripping Voltammetry Using a Disposable and Low-Cost Carbon Screen-Printed Electrode

Víctor Padilla <sup>1</sup>, Núria Serrano <sup>1,2,\*</sup> and José Manuel Díaz-Cruz <sup>1,2,\*</sup>

<sup>1</sup> Department of Chemical Engineering and Analytical Chemistry, University of Barcelona, Martí i Franquès 1-11, 08028 Barcelona, Spain; victorpadilla777@gmail.com

<sup>2</sup> Institut de Recerca de l'Aigua (IdRA), University of Barcelona, 08028 Barcelona, Spain

\* Correspondence: nuria.serrano@ub.edu (N.S.); josemanuel.diaz@ub.edu (J.M.D.-C.)

## Supporting information

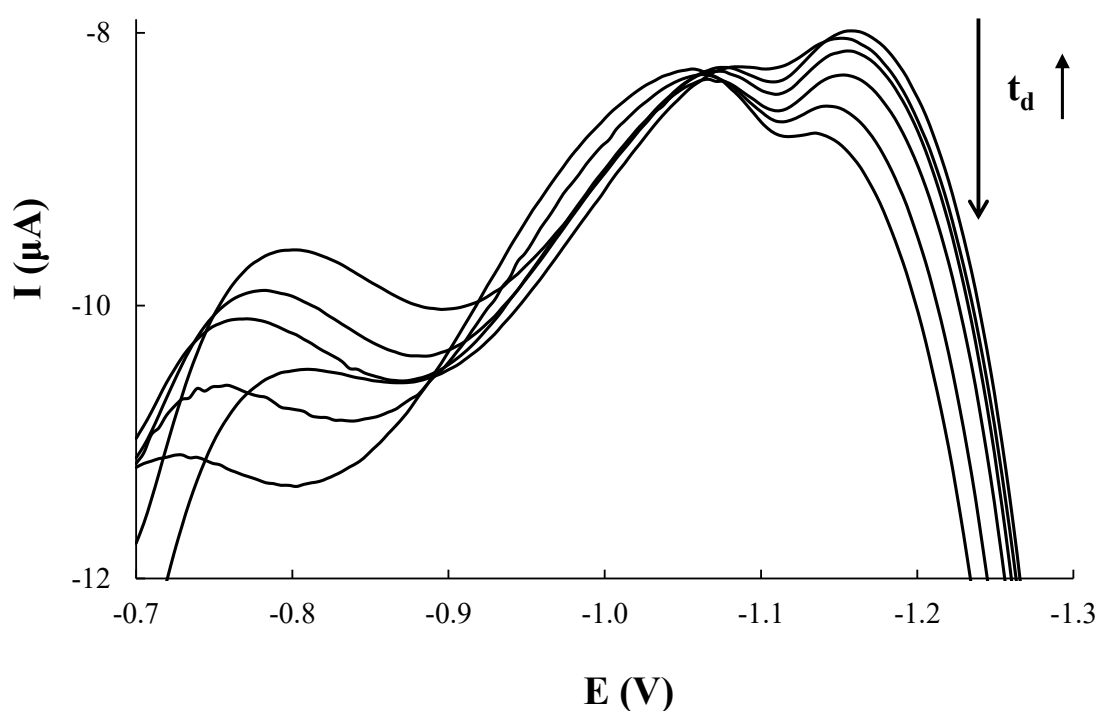

**Figure S1.** Differential pulse adsorptive stripping voltammograms of  $10 \mu\text{g L}^{-1}$  Ni(II) recorded on SPCE in  $0.1 \text{ mol L}^{-1}$  ammonia / ammonium buffer solution (pH 9.2) and  $5 \times 10^{-5} \text{ mol L}^{-1}$  DMG applying a  $E_d$  of  $-0.7 \text{ V}$  and a  $t_d$  of 30, 60, 90, 120, 180 and 240 s.
